# Supplementary material for: Coordination of Rapid Sphingolipid Responses to Heat Stress in Yeast
Source: PLoS Comput Biol. 2013 May 30;9(5):e1003078. doi: 10.1371/journal.pcbi.1003078 (PMC3667767; doi:10.1371/journal.pcbi.1003078)
Supplement: Table S3 — Estimated Q10 values, based on the initial increases in enzyme activities. (DOCX) [file pcbi.1003078.s014.docx]

**Table S3: Estimated Q10 Values, Based on the Initial Increases in Enzyme Activities**

| **Enzyme** | **Variable** | **Q10** |
| --- | --- | --- |
| 3-keto-dihydrosphingosine reductase | *X*27 | 3.1394 |
| Dihydroceramide aklaline ceramidase | *X*29 | *3.0150* |
| Inositol phosphorylceramide synthase | *X*33 | *4.0227* |
| Ceramide synthase | *X*34 | *1.9215* |
| Mannosyl inositol phosphoceramide synthase | *X*35 | *4.0227* |
| Sphingoid base kinase | *X*36 | *1.1117* |
| Sphingoid 1 phosphate phosphatase | *X*41 | *1.2246* |
| GPI remodelase | *X*43 | *2.4014* |
| Sphingosine phosphate lyase | *X*50 | *0.1673* |
| Inositol phosphosphingolipid phospholipase C | *X*51 | *3.8952* |
| Phytoceramide alkaline ceramidase | *X*53 | *3.5153* |
| Hydroxylase | *X*54 | *2.1601* |
| Mannosyldiinositol phosphorylceramide synthase | *X*55 | *4.0227* |
| Serine palmitoyltransferase | *X*57 | *2.4014* |
| Very long chain fatty acid synthase | *X*59 | *2.5230* |
